# Supplementary material for: Conservation, diversification and expansion of C2H2 zinc finger proteins in the Arabidopsis thaliana genome
Source: Springer Nature journal article supplement (doi:10.1186/1471-2164-5-39), 2004-07-05
Supplement: Additional file 1 [file 1471-2164-5-39-s1.pdf]

**Table S1. Complete set of classified C2H2 zinc finger proteins in *A. thaliana*.** Listed are ZFP subsets and subfamilies as classified in the text. ZFPs that are conserved in other phyla than plants are highlighted in green, members of the A1-family in blue and of the C1-family in red. **Legend:** reference numbers for subsets assigned to plant subfamilies (pl-SF) or evolutionary conserved subfamilies (cons. SF), AGIcode with database link, gene name (if available), names of cons. SF, ZFarrangement (i= isolated/dispersed ZFs, u = ZF with unusual spacing, d = degenerated ZFs, - = tandem arrangement/short linker (1-10 amino acids), \* = linker 0 amino acids, . = dispersed arrangement/long spacer), conserved non-finger domains (NFDs), novel = conserved plant/AT motifs found with MEME. Family and domain acronyms are explained in Table 2.

| Subset             | AGIcode                   | Gene name | Cons. ZF-fam | ZFarrangement           | conserved NFDs | Remarks/Refer. |
|--------------------|---------------------------|-----------|--------------|-------------------------|----------------|----------------|
| <b>A tandem</b>    |                           |           |              |                         |                |                |
| <b>A1 pl-SF</b>    |                           |           |              |                         |                |                |
| A1a-01             | <a href="#">At1g03840</a> | -         | -            | 1i.2u-3-4               | novel          | [19]           |
| A1a-02             | <a href="#">At1g14580</a> | -         | -            | 1i.2u-3-4               | novel          | [20]           |
| A1a-03             | <a href="#">At1g55110</a> | -         | -            | 1i.2u-3-4               | novel          |                |
| A1a-04             | <a href="#">At2g02070</a> | -         | -            | 1i.2u-3-4               | novel          |                |
| A1a-05             | <a href="#">At2g02080</a> | -         | -            | 1i.2u-3-4               | novel          |                |
| A1a-06             | <a href="#">At3g13810</a> | -         | -            | 1i.2u-3-4               | novel          |                |
| A1a-07             | <a href="#">At3g45260</a> | -         | -            | 1i.2u-3-4               | novel          |                |
| A1a-08             | <a href="#">At3g50700</a> | -         | -            | 1i.2u-3-4               | novel          |                |
| A1a-09             | <a href="#">At4g02670</a> | -         | -            | 1i.2u-3-4               | novel          |                |
| A1a-10             | <a href="#">At5g03150</a> | -         | -            | 1i.2u-3-4               | novel          |                |
| A1a-11             | <a href="#">At5g44160</a> | -         | -            | 1i.2u-3-4               | novel          |                |
| A1a-12             | <a href="#">At5g60470</a> | -         | -            | 1i.2u-3-4               | novel          |                |
| A1a-13             | <a href="#">At5g66730</a> | -         | -            | 1i.2u-3-4               | novel          |                |
| A1b-01             | <a href="#">At1g25250</a> | -         | -            | 1i.2u-3-4               | novel          |                |
| A1b-02             | <a href="#">At1g68130</a> | -         | -            | 1i.2u-3-4               | novel          |                |
| A1b-03             | <a href="#">At2g01940</a> | -         | -            | 1i.2u-3-4               | novel          |                |
| A1c-01             | <a href="#">At1g34370</a> | -         | -            | 1i.2u-3u-4              | novel          |                |
| A1c-02             | <a href="#">At5g22890</a> | -         | -            | 1i.2u-3u-4              | novel          |                |
| A1d-01             | <a href="#">At1g08290</a> | WIP3      | -            | 1i.2u-3-4u              | novel          |                |
| A1d-02             | <a href="#">At1g13290</a> | WIP6      | -            | 1i.2u-3-4u              | novel          |                |
| A1d-03             | <a href="#">At1g34790</a> | TT1       | -            | 1i.2u-3-4u              | novel          | [22]           |
| A1d-04             | <a href="#">At1g51220</a> | WIP5      | -            | 1i.2u-3-4u              | novel          |                |
| A1d-05             | <a href="#">At3g20880</a> | WIP4      | -            | 1i.2u-3-4u              | novel          |                |
| A1d-06             | <a href="#">At3g57670</a> | WIP2      | -            | 1i.2u-3-4u              | novel          |                |
| <b>A2 pl-SF</b>    |                           |           |              |                         |                |                |
| A2-01              | <a href="#">At3g48430</a> | -         | -            | 1df*2-3-4               | JmjN+JmjC      |                |
| A2-02              | <a href="#">At5g04240</a> | -         | -            | 1df*2-3-4               | JmjN+JmjC      |                |
| <b>A3 pl-SF</b>    |                           |           |              |                         |                |                |
| A3-01a             | <a href="#">At2g23740</a> | -         | -            | 1-2.3i.                 | PreSETSET      |                |
| <b>A4 cons. SF</b> |                           |           |              |                         |                |                |
| A4-01              | <a href="#">At5g14140</a> | -         | newSF1       | 1-2.3i                  |                |                |
| A4-02              | <a href="#">At3g62240</a> | -         | newSF2       | 1*2u*3u                 | RING           |                |
| A4-03              | <a href="#">At2g47090</a> | -         | newSF2       | 1*2u                    | RING           |                |
| A4-04              | <a href="#">At1g30970</a> | -         | ZP207SF      | 1*2                     |                |                |
| A4-05              | <a href="#">At4g06634</a> | -         | YY1          | 1-2-3-4.5i              |                | [10]           |
| <b>B cons. SF</b>  |                           |           |              |                         |                |                |
| B1-01              | <a href="#">At1g72050</a> | TF3A      | TF3A         | 1i.2-3-4.<br>5-6-7u-8-9 |                | [9]            |

| <i>Subset</i>      | <i>AGICode</i>            | <i>Gene name</i> | <i>Cons. ZF-fam</i> | <i>ZFarrangement</i> | <i>conserved NFDs</i> | <i>Remarks/Refer.</i> |
|--------------------|---------------------------|------------------|---------------------|----------------------|-----------------------|-----------------------|
| <b>C dispersed</b> |                           |                  |                     |                      |                       |                       |
| <b>C1 C2H3</b>     |                           |                  |                     |                      |                       |                       |
| <b>C1-1i pl-SF</b> |                           |                  |                     |                      |                       |                       |
| C1-1iAa-01         | <a href="#">At1g66140</a> | ZFP 4            | -                   | 1i                   | novel                 | [25]                  |
| C1-1iAa-02         | <a href="#">At1g24630</a> | ZFP 7            | -                   | 1i                   | novel                 | [25]                  |
| C1-1iAa-03         | <a href="#">At1g80730</a> | ZFP 1            | -                   | 1i                   | novel                 | [25]                  |
| C1-1iAa-04         | <a href="#">At5g57520</a> | ZFP 2            | -                   | 1i                   | novel                 | [25]                  |
| C1-1iAa-05         | <a href="#">At5g10970</a> | -                | -                   | 1i                   | novel                 |                       |
| C1-1iAa-06         | <a href="#">At5g25160</a> | ZFP 3            | -                   | 1i                   | novel                 | [25]                  |
| C1-1iAa-07         | <a href="#">At5g14010</a> | -                | -                   | 1i                   | novel                 |                       |
| C1-1iAa-08         | <a href="#">At5g48890</a> | -                | -                   | 1i                   | novel                 |                       |
| C1-1iAb-01         | <a href="#">At2g41940</a> | ZFP 8            | -                   | 1i                   | novel                 | [25]                  |
| C1-1iAb-02         | <a href="#">At3g58070</a> | -                | -                   | 1i                   | novel                 |                       |
| C1-1iAb-03         | <a href="#">At5g06650</a> | -                | -                   | 1i                   | novel                 |                       |
| C1-1iAc-01         | <a href="#">At5g27880</a> | -                | -                   | 1i                   | novel                 |                       |
| C1-1iAc-02         | <a href="#">At5g01860</a> | -                | -                   | 1i                   | novel                 |                       |
| C1-1iAd-01         | <a href="#">At1g67030</a> | ZFP 6            | -                   | 1i                   | novel                 | [25]                  |
| C1-1iAd-02         | <a href="#">At1g68360</a> | -                | -                   | 1i                   | novel                 |                       |
| C1-1iAd-03         | <a href="#">At1g10480</a> | ZFP 5            | -                   | 1i                   | novel                 | [25]                  |
| C1-1iAe-01         | <a href="#">At5g05120</a> | -                | -                   | 1i                   | novel                 |                       |
| C1-1iAf-01         | <a href="#">At3g09290</a> | -                | -                   | 1i                   | novel                 |                       |
| C1-1iAf-02         | <a href="#">At3g53820</a> | -                | -                   | 1i                   | novel                 |                       |
| C1-1iAf-03         | <a href="#">At5g43540</a> | -                | -                   | 1i                   | novel                 |                       |
| C1-1iAf-04         | <a href="#">At3g23140</a> | -                | -                   | 1i                   | novel                 |                       |
| C1-1iAg-01         | <a href="#">At2g42410</a> | ZFP11            | -                   | 1i                   | novel                 | [33]                  |
| C1-1iAg-02         | <a href="#">At3g23130</a> | SUP              | -                   | 1i                   | novel                 | [28, 30, 34]          |
| C1-1iAg-03         | <a href="#">At4g17810</a> | -                | -                   | 1i                   | novel                 |                       |
| C1-1iAg-04         | <a href="#">At2g37740</a> | ZFP10            | -                   | 1i                   | novel                 |                       |
| C1-1iAg-05         | <a href="#">At5g06070</a> | RBE              | -                   | 1i                   | novel                 | [32]                  |
| C1-1iAh-01         | <a href="#">At1g13400</a> | -                | -                   | 1i                   | novel                 |                       |
| C1-1iAh-02         | <a href="#">At1g68480</a> | -                | -                   | 1i                   | novel                 | [47, 48]              |
| C1-1iBx-01         | <a href="#">At5g54360</a> | -                | -                   | 1i                   | novel                 |                       |
| C1-1iBx-02         | <a href="#">At5g54340</a> | -                | -                   | 1i                   | novel                 |                       |
| C1-1iCa-01         | <a href="#">At4g35610</a> | -                | -                   | 1i                   | novel                 |                       |
| C1-1iCa-02         | <a href="#">At4g35700</a> | -                | -                   | 1i                   | novel                 |                       |
| C1-1iCb-01         | <a href="#">At4g16610</a> | -                | -                   | 1i                   | novel                 |                       |
| <b>C1-Sa pl-SF</b> |                           |                  |                     |                      |                       |                       |
| C1-1iSa-01         | <a href="#">At2g15740</a> | -                | -                   | 1i                   | nd                    |                       |
| C1-1iSa-02         | <a href="#">At2g18490</a> | -                | -                   | 1i                   | nd                    |                       |
| C1-1iSa-03         | <a href="#">At5g42640</a> | -                | -                   | 1i                   | nd                    |                       |
| <b>C1-Q pl-SF</b>  |                           |                  |                     |                      |                       |                       |
| C1-1iQ-01          | <a href="#">At2g36475</a> | -                | -                   | 1i                   | nd                    |                       |
| C1-1iQ-02          | <a href="#">At4g04885</a> | -                | -                   | 1i                   | nd                    |                       |
| C1-1iQ-03          | <a href="#">At1g66500</a> | -                | -                   | 1i                   | nd                    |                       |
| C1-1iQ-04          | <a href="#">At5g43620</a> | -                | -                   | 1i                   | nd                    |                       |
| <b>C1 cons. SF</b> |                           |                  |                     |                      |                       |                       |
| C1-1iSF1-01        | <a href="#">At5g09740</a> | -                | SAS                 | 1i                   | ChromoSAS             | H3C ZF type           |
| C1-1iSF1-02        | <a href="#">At5g64610</a> | -                | SAS                 | 1i                   | ChromoSAS             | H3C ZF type           |
| <b>C1-unique</b>   |                           |                  |                     |                      |                       |                       |
| C1-1iU-01          | <a href="#">At2g01650</a> | -                |                     | 1i                   | UBX                   | H3C ZF type           |
| C1-1iU-02          | <a href="#">At4g25610</a> | -                |                     | 1i                   |                       |                       |

| <i>Subset</i>      | <i>AGICode</i>            | <i>Gene name</i> | <i>Cons. ZF-fam</i> | <i>ZFarrangement</i>   | <i>conserved NFDs</i> | <i>Remarks/Refer.</i> |
|--------------------|---------------------------|------------------|---------------------|------------------------|-----------------------|-----------------------|
| <b>C1-2i pl-SF</b> |                           |                  |                     |                        |                       |                       |
| C1-2iA-01          | <a href="#">At2g37430</a> | ZAT11            | -                   | 1i.2i                  | novel                 | [26]                  |
| C1-2iA-02          | <a href="#">At3g53600</a> | -                | -                   | 1i.2i                  | novel                 |                       |
| C1-2iB-01          | <a href="#">At2g28710</a> | -                | -                   | 1i.2i                  | novel                 |                       |
| C1-2iB-02          | <a href="#">At3g46070</a> | -                | -                   | 1i.2i                  | novel                 |                       |
| C1-2iB-03          | <a href="#">At3g46080</a> | -                | -                   | 1i.2i                  | novel                 |                       |
| C1-2iB-04          | <a href="#">At3g46090</a> | ZAT7             | -                   | 1i.2i                  | novel                 | [26]                  |
| C1-2iB-05          | <a href="#">At5g59820</a> | ZAT12            | -                   | 1i.2i                  | novel                 | [26]                  |
| C1-2iC-01          | <a href="#">At2g28200</a> | ZAT5             | -                   | 1i.2i                  | novel                 | [26]                  |
| C1-2iC-02          | <a href="#">At3g10470</a> | -                | -                   | 1i.2i                  | novel                 |                       |
| C1-2iC-03          | <a href="#">At5g03510</a> | -                | -                   | 1i.2i                  | novel                 |                       |
| C1-2iC-04          | <a href="#">At5g04390</a> | -                | -                   | 1i.2i                  | novel                 |                       |
| C1-2iD-01          | <a href="#">At1g27730</a> | ZAT10            | -                   | 1i.2i                  | novel                 | [26]                  |
| C1-2iD-02          | <a href="#">At3g19580</a> | AZF2             | -                   | 1i.2i                  | novel                 | [27]                  |
| C1-2iD-03          | <a href="#">At3g49930</a> | -                | -                   | 1i.2i                  | novel                 |                       |
| C1-2iD-04          | <a href="#">At5g04340</a> | -                | -                   | 1i.2i                  | novel                 |                       |
| C1-2iD-05          | <a href="#">At5g43170</a> | AZF3             | -                   | 1i.2i                  | novel                 | [27]                  |
| C1-2iD-06          | <a href="#">At5g67450</a> | AZF1             | -                   | 1I.2I                  | novel                 | [27]                  |
| C1-2iX1-01         | <a href="#">At1g02040</a> | -                | -                   | 1i.2i                  | novel                 |                       |
| C1-2iX2-01         | <a href="#">At2g26940</a> | -                | -                   | 1i.2i                  | novel                 |                       |
| C1-2iX3-new        | <a href="#">At4g04404</a> | -                | -                   | 1i.2id                 | nd                    |                       |
| <b>C1C2 mixed</b>  |                           |                  |                     |                        |                       |                       |
| C1C2-2iX-01        | <a href="#">At3g01030</a> | -                | -                   | 1i.2i                  | novel                 | H4H and H3H           |
| C1C2-2iX-02        | <a href="#">At5g15480</a> | -                | -                   | 1i.2i                  | novel                 | ZF types              |
| <b>C1-3i pl-SF</b> |                           |                  |                     |                        |                       |                       |
| C1-3iA-01          | <a href="#">At1g02030</a> | ZAT1             | -                   | 1i.2i.3i               | novel                 | [26]                  |
| C1-3iA-02          | <a href="#">At2g45120</a> | -                | -                   | 1i.2i.3i               | novel                 |                       |
| C1-3iA-03          | <a href="#">At3g60580</a> | -                | -                   | 1i.2i.3i               | novel                 |                       |
| C1-3iB-01          | <a href="#">At5g61470</a> | -                | -                   | 1i.2i.3i               | novel                 |                       |
| C1-3iC-01          | <a href="#">At2g17180</a> | -                | -                   | 1i.2i.3i               | novel                 |                       |
| C1-3iC-02          | <a href="#">At4g35280</a> | -                | -                   | 1i.2i.3i               | novel                 |                       |
| C1-3iD-01          | <a href="#">At1g26590</a> | -                | -                   | 1i.2i.3i               | novel                 |                       |
| C1-3iD-02          | <a href="#">At1g26610</a> | -                | -                   | 1i.2i.3i               | novel                 |                       |
| <b>C1-4i pl-SF</b> |                           |                  |                     |                        |                       |                       |
| C1-4iA-01          | <a href="#">At1g49900</a> | ATZF1            | -                   | 1i.2i.3i.4i            | novel                 |                       |
| C1-4iB-01          | <a href="#">At5g56200</a> | -                | -                   | 1i.2i.3i.4i            | novel                 |                       |
| <b>C1-5i pl-SF</b> |                           |                  |                     |                        |                       |                       |
| C1-5iX-01          | <a href="#">At3g29340</a> | -                | -                   | 1i.2i.3i.4i<br>.5i.6id | novel                 |                       |

| <i>Subset</i>      | <i>AGICode</i>            | <i>Gene name</i> | <i>Cons. ZF-fam</i> | <i>ZFarrangement</i> | <i>conserved NFDs</i> | <i>Remarks/Refer.</i> |
|--------------------|---------------------------|------------------|---------------------|----------------------|-----------------------|-----------------------|
| <b>C2 C2H4</b>     |                           |                  |                     |                      |                       |                       |
| <b>C2-1i p1-SF</b> |                           |                  |                     |                      |                       |                       |
| C2-1iA-01          | <a href="#">At1g11490</a> | -                | -                   | 1i                   | novel                 |                       |
| C2-1iA-02          | <a href="#">At1g47860</a> | -                | -                   | 1i                   | novel                 |                       |
| C2-1iA-03          | <a href="#">At1g75710</a> | -                | -                   | 1i                   | novel                 |                       |
| C2-1iA-04          | <a href="#">At2g29660</a> | -                | -                   | 1i                   | novel                 |                       |
| C2-1iA-05          | <a href="#">At4g27240</a> | -                | -                   | 1i                   | novel                 |                       |
| C2-1iA-06          | <a href="#">At5g54630</a> | -                | -                   | 1i                   | novel                 |                       |
| <b>C2-B At-SF</b>  |                           |                  |                     |                      |                       |                       |
| C2-1iB-01          | <a href="#">At1g65110</a> | -                | -                   | 1i                   | novel                 | SF has also           |
| C2-1iB-02          | <a href="#">At1g65120</a> | -                | -                   | 1i                   | novel                 | DUF627 and            |
| C2-1iB-03          | <a href="#">At1g65130</a> | -                | -                   | 1i                   | novel                 | DUF629 (Pfam)         |
| C2-1iB-04          | <a href="#">At1g65200</a> | -                | -                   | 1i                   | novel                 |                       |
| C2-1iB-05          | <a href="#">At2g27630</a> | -                | -                   | 1i                   | novel                 |                       |
| C2-1iB-06          | <a href="#">At2g27650</a> | -                | -                   | 1i                   | novel                 | C3C ZF type           |
| C2-1iB-07          | <a href="#">At2g34220</a> | -                | -                   | 1i                   | novel                 |                       |
| C2-1iB-08          | <a href="#">At2g34230</a> | -                | -                   | 1i                   | novel                 |                       |
| C2-1iB-09          | <a href="#">At2g34240</a> | -                | -                   | 1i                   | novel                 |                       |
| C2-1iB-10          | <a href="#">At3g47890</a> | -                | -                   | 1i                   | novel                 |                       |
| C2-1iB-11          | <a href="#">At3g47910</a> | -                | -                   | 1i                   | novel                 |                       |
| C2-1iB-12          | <a href="#">At5g02660</a> | -                | -                   | 1i                   | novel                 |                       |
| C2-1iB-13          | <a href="#">At5g51530</a> | -                | -                   | 1i                   | novel                 | C3C ZF type           |
| C2-1iB-14          | <a href="#">At5g61940</a> | -                | -                   | 1i                   | novel                 | C3C ZF type           |
| C2-1iB-15          | <a href="#">At5g61950</a> | -                | -                   | 1i                   | novel                 | C3C ZF type           |
| C2-1iB-16          | <a href="#">At1g52430</a> | -                | -                   | 1id                  | novel                 | C0C ZF type           |
| C2-1iB-17          | <a href="#">At1g52450</a> | -                | -                   | 1id                  | novel                 | C0C ZF type           |
| <b>C2-Sb At-SF</b> |                           |                  |                     |                      |                       |                       |
| C2-1iSb-01         | <a href="#">At4g26030</a> | -                | -                   | 1i                   | nd                    |                       |
| C2-1iSb-02         | <a href="#">At5g22990</a> | -                | -                   | 1i                   | nd                    |                       |
| <b>C2 pairs</b>    |                           |                  |                     |                      |                       |                       |
| C2-1iC-01          | <a href="#">At4g12240</a> | -                | -                   | 1i                   | novel                 |                       |
| C2-1iC-02          | <a href="#">At5g52010</a> | -                | -                   | 1i                   | novel                 |                       |
| C2-1iD-01          | <a href="#">At3g44750</a> | -                | -                   | 1i                   | novel                 | HD2 [49]              |
| C2-1iD-02          | <a href="#">At5g03740</a> | -                | -                   | 1i                   | novel                 | HD2 [49]              |
| C2-1iE-01          | <a href="#">At3g02790</a> | -                | -                   | 1i                   | novel                 |                       |
| C2-1iE-02          | <a href="#">At5g16470</a> | -                | -                   | 1i                   | novel                 |                       |
| C2-1iF-01          | <a href="#">At3g57480</a> | -                | -                   | 1i                   | 2x ZF-AN1             |                       |
| C2-1iF-02          | <a href="#">At2g41835</a> | -                | -                   | 1i.2i                | 2X ZF-AN1             |                       |
| <b>C2-unique</b>   |                           |                  |                     |                      |                       |                       |
| C2-1iU1-01         | <a href="#">At1g04445</a> | -                | -                   | 1i                   |                       |                       |
| C2-1iU2-01         | <a href="#">At3g01460</a> | -                | -                   | 1i                   | 2PHD/RING<br>1MBD     | H4C ZF type           |
| <b>C2 cons. SF</b> |                           |                  |                     |                      |                       |                       |
| C2-1iSF1-01        | <a href="#">At2g27100</a> | SE               | SE                  | 1i                   | newNFD                | [17]                  |
| C2-1iSF2-01        | <a href="#">At5g40710</a> | -                | newSF3              | 1i                   | nd                    |                       |
| C2-1iSF2-02        | <a href="#">At5g63280</a> | -                | newSF3              | 1i                   | nd                    |                       |
| C2-1iSF3-01        | <a href="#">At5g01160</a> | -                | E7                  | 1i                   | RING                  | E7-cadher.bdg.        |
| C2-1iSF4-01        | <a href="#">At3g12270</a> | -                | PRMT                | 1i                   | PRMT3                 | Arg-met-trans.        |
| C2-1iSF5-01        | <a href="#">At5g01310</a> | -                | newSF4              | 1i                   | HLH=ORF1              |                       |
| C2-1iSF6-01        | <a href="#">At2g35670</a> | FIS2             | VEF                 | 1i                   | newNFD                | [12]                  |
| C2-1iSF6-02        | <a href="#">At4g16845</a> | VRN2             | VEF                 | 1i                   | newNFD                | [14]                  |
| C2-1iSF6-03        | <a href="#">At5g51230</a> | EMF2             | VEF                 | 1i                   | newNFD                | [15]                  |

| <i>Subset</i>      | <i>AGICode</i>            | <i>Gene name</i> | <i>Cons. ZF-fam</i> | <i>ZFarrangement</i> | <i>conserved NFDs</i> | <i>Remarks/Refer.</i> |
|--------------------|---------------------------|------------------|---------------------|----------------------|-----------------------|-----------------------|
| <b>C3 C2H5</b>     |                           |                  |                     |                      |                       |                       |
| <b>C3 p1-SF</b>    |                           |                  |                     |                      |                       |                       |
| C3-1iA-01          | <a href="#">At3g27970</a> | -                | -                   | 1i                   | EXO3                  |                       |
| C3-1iA-02          | <a href="#">At5g40310</a> | -                | -                   | 1i                   | EXO3                  |                       |
| C3-3iA-03          | <a href="#">At2g48100</a> | -                | -                   | 1i.2i.3i             | EXO3                  |                       |
| C3-1iB-01          | <a href="#">At1g01350</a> | -                | -                   | 1i                   | C3H.RING.<br>DUF537   |                       |
| C3-2iB-02          | <a href="#">At3g62850</a> | -                | -                   | 1i.2i                | 2 DUF537              |                       |
| C3-4iB-03          | <a href="#">At5g61190</a> | -                | -                   | 1i.2i.3i.4i          | DUF537                |                       |
| <b>C3 cons. SF</b> |                           |                  |                     |                      |                       |                       |
| C3-1iSF1-01        | <a href="#">At5g26610</a> | -                | newSF5              | 1i                   | G-patch               | U1-ZF                 |
| C3-1iSF2-01        | <a href="#">At3g02860</a> | -                | newSF6              | 1i                   | nd                    |                       |
| C3-1iSF3-01        | <a href="#">At1g01930</a> | -                | newSF7              | 1i                   | ANK                   | U1-ZF                 |
| C3-1iSF4-01        | <a href="#">At1g43860</a> | -                | newSF8              | 1i                   | UPF0023               | U1-ZF                 |
| C3-1iSF5-01        | <a href="#">At1g50670</a> | -                | newSF9              | 1i                   | OTU                   |                       |
| C3-1iSF6-01        | <a href="#">At1g55460</a> | -                | KIN17               | 1i                   | KOW                   | U1-ZF                 |
| C3-1iSF7-01        | <a href="#">At3g05760</a> | -                | newSF10             | 1i                   | nd                    | U1-ZF                 |
| C3-1iSF8-01        | <a href="#">At2g32600</a> | -                | SAP62               | 1i                   | nd                    | U1-ZF                 |
| C3-1iSF9-01        | <a href="#">At5g06160</a> | -                | SAP61               | 1i                   | nd                    | X13 spacing           |
| C3-1iSF10-01       | <a href="#">At2g27760</a> | -                | IPPT                | 1i                   | IPPT                  | X13 spacing           |
| C3-2iSF11-01       | <a href="#">At1g74250</a> | -                | DNAJ                | 1i.2i                | DNAJ                  | U1-ZF                 |
| C3-2iSF12-01       | <a href="#">At2g36930</a> | -                | newSF11             | 1i.2i                | nd                    | U1-ZF                 |
| C3-2iSF13-01       | <a href="#">At1g04850</a> | -                | newSF12             | 1i.2i                | UBA/PUG               |                       |
| C3-4iSF14-01       | <a href="#">At2g24500</a> | FZF              | FZFnew              | 1i.2i.3i.4u          | nd                    | U1-ZF                 |
| C3-4iSF14-02       | <a href="#">At4g31420</a> | FZF              | FZFnew              | 1i.2i.3i.4u          | nd                    | U1-ZF                 |
| C3-4iSF15-01       | <a href="#">At2g19380</a> |                  | newSF13             | 1i.2i.3i.4           | RRM                   | U1-ZF                 |
